# Supplementary material for: Bardet–Biedl syndrome 3 protein promotes ciliary exit of the signaling protein phospholipase D via the BBSome
Source: eLife. 2021 Feb 15;10:e59119. doi: 10.7554/eLife.59119 (PMC7963478; doi:10.7554/eLife.59119)
Supplement: Figure 4—figure supplement 1—source data 1. [file elife-59119-fig4-figsupp1-data1.xlsx]

## Sheet: Sheet1
	BBS3+GTP			BBS3A73L+GTP			BBS3T31R+GTP
Min	Mean	SD		Mean	SD		Mean	SD
0	0.2467	0.015		0.2467	0.015		0.24667	0.012
15	0.25333	0.01537		0.2493	0.01537		0.24681	0.01351
30	0.26367	0.0195		0.25017	0.0195		0.24712	0.0178
60	0.28267	0.01159		0.25197	0.01159		0.24798	0.0095
120	0.309	0.01852		0.25918	0.01102		0.24818	0.01305
