# Supplementary material for: Bardet–Biedl syndrome 3 protein promotes ciliary exit of the signaling protein phospholipase D via the BBSome
Source: eLife. 2021 Feb 15;10:e59119. doi: 10.7554/eLife.59119 (PMC7963478; doi:10.7554/eLife.59119)
Supplement: Figure 6—source data 1. [file elife-59119-fig6-data1.xlsx]

## Sheet: Sheet1
	Anterograde speed (μm/sec)		Retrograde speed (μm/sec)			Anterograde frequency (particle/sec)		Retrograde frequency (particle/sec)
	BBS5::YFP	BBS5::YFPclip1	BBS5::YFP	BBS5::YFPclip1		BBS5::YFP	BBS5::YFPclip1	BBS5::YFP	BBS5::YFPclip1
	2.01	2.11	3.64148	3.36		0.7	0.85	0.22	0.46
	2	2.02	3.04786	3.14		0.68	0.78	0.32	0.36
	1.92	2.19	3.60325	3.31		0.7	0.68	0.12	0.55
	1.8	2.15	3.36869	3.22		0.87	0.75	0.33	0.32
	1.89	2.04	3.05802	3.56		0.62	0.78	0.42	0.32
	2.12	1.85	3.47682	3.54		0.78	0.67	0.33	0.63
	2.2	1.97	3.41361	3.18		0.62	0.58	0.33	0.47
	2.03	2.19	3.73363	3.28		0.87	0.42	0.57	0.47
	1.67	2.1	3.59327	3.54		0.54	0.67	0.33	0.39
	1.97	2.18	3.66813	3.24		0.54	0.58	0.42	0.47
	1.95	1.98	3.34249	3.02		0.87	0.62	0.25	0.55
	1.93	1.89	3.37805	3.24		0.62	0.67	0.35	0.32
	1.95	2.18	3.68134	3.45		0.47	0.72	0.33	0.39
	1.94	2.09	2.84467	3.13		0.54	0.58	0.5	0.47
	1.94	1.8	3.26301	3.24		0.62	0.58	0.13	0.47
	1.93	1.97	3.69807	3.27		0.78	0.58	0.33	0.47
	1.89	1.92	3.98254	3.75		0.7	0.65	0.5	0.47
	1.9	2.08	3.62696	3.18		0.7	0.75	0.42	0.39
	2.03	1.91	3.18332	3.24		0.78	0.65	0.25	0.47
	2.05	1.85	3.55584	3.25		0.62	0.78	0.55	0.47
	1.89	1.9	3.42654	3.48		0.7	0.65	0.25	0.47
	2.11	2.01	3.49119	3.31		0.62	0.75	0.42	0.39
	1.99	1.98	3.27137	3.58		0.7	0.75	0.33	0.32
	2.18	1.86	3.18332	3.48		0.78	0.75	0.25	0.47
	1.98	2.03	2.95003	3.1		0.7	0.67	0.55	0.39
	2.11	2.12	3.59327	3.39		0.54	0.67	0.33	0.55
	2.05	2.12	3.09967	3.43		0.62	0.78	0.5	0.47
	2.11	1.87	3.63486	3.95		0.62	0.78	0.33	0.39
	2.16	2.12	3.36869	3.37		0.7	0.67	0.42	0.39
	1.91	2.02	3.24795	3.16		0.88	0.58	0.42	0.32
	2	1.98	3.60306	3.44		0.78	0.58	0.33	0.24
	2.01	1.99	3.87047	3.42		0.7	0.68	0.33	0.32
	1.96	2.13	3.16675	3.35		0.54	0.58	0.42	0.32
	2	1.8	4.06595	3.25		0.78	0.65	0.25	0.32
	2.03	2.17	3.73279	3.37		0.54	0.67	0.53	0.39
	1.9	1.93	3.19021	3.28		0.67	0.78	0.42	0.15
	1.99	1.83	3.48157	3.56		0.87	0.88	0.33	0.32
	1.88	1.89	3.15268	3.16		0.62	0.88	0.42	0.48
	1.93	1.89	3.13954	3.16		0.54	0.77	0.53	0.39
	1.91	1.89	3.24795	3.16		0.7	0.67	0.42	0.32
	2	2.06	3.37787	3.48		0.7	0.78	0.42	0.32
	1.95	2.13	3.54468	3.42		0.62	0.77	0.46	0.47
	1.98	2.18	3.68101	3.37		0.82	0.82	0.15	0.32
	2.11	2.05	3.16675	3.49		0.42	0.76	0.26	0.32
	1.99	2.13	2.81489	3.32		0.67	0.77	0.51	0.55
	1.89	2.09	3.16675	3.13		0.58	0.72	0.36	0.55
	1.86	2.13	3.27047	3.67		0.62	0.72	0.51	0.32
	1.84	1.89	3.09638	3.17		0.67	0.87	0.31	0.39
	2.38	1.85	3.26029	3.34		0.72	0.82	0.46	0.47
	1.89	2.16	3.34875	3.16		0.58	0.7	0.32	0.39
	1.98	2.22	3.14605	3.14		0.58	0.7	0.5	0.39
	2.01	2.03	3.02601	3.23		0.58	0.67	0.16	0.47
	1.99	2.15	3.06326	3.29		0.65	0.77	0.21	0.39
	1.96	2.09	3.5968	3.28		0.75	0.77	0.47	0.55
	2.2	2.14	3.39443	3.4		0.65	0.7	0.47	0.47
	2.18	2.14	3.24795	3.19		0.78	0.7	0.39	0.32
	2.16	2.18	3.25472	3.12		0.65	0.78	0.47	0.32
	2.25	1.91	3.11649	3.16		0.75	0.62	0.55	0.32
	2.22	2.12	3.01595	2.9		0.75	0.7	0.32	0.47
	2.13	2.09	3.23191	3.23		0.75	0.62	0.39	0.39
	1.98	2.03	3.52488	3.24		0.67	0.7	0.47	0.47
	2.1	1.98	3.42885	3.39		0.67	0.78	0.47	0.47
	2.21	2.01	3.25777	3.34		0.78	0.7	0.47	0.39
	2.06	2.21	3.37456	3.44		0.78	0.54	0.47	0.39
	2.01	1.89	3.00581	3.29		0.67	0.62	0.39	0.47
	1.87	1.82	3.24018	3.65		0.58	0.62	0.47	0.55
	1.97	2.04	3.37456	3.33		0.58	0.7	0.47	0.43
	1.94	1.98	3.30678	3.37		0.68	0.88	0.47	0.29
	1.99	2.07	3.21799	3.37		0.58	0.78	0.39	0.36
	1.97	2.14	3.3155	3.24		0.65	0.7	0.32	0.43
	2.21	2.14	2.86641	3.73		0.67	0.54	0.47	0.36
	2.11	2.09	3.37261	3.21		0.78	0.78	0.39	0.49
	1.96	2.14	2.74444	3.74		0.77	0.54	0.55	0.36
	2.07	1.98	2.57164	3.43		0.67	0.67	0.47	0.36
	1.96	2.15	3.306	3.15		0.78	0.87	0.39	0.49
	1.89	1.96	2.90562	3.35		0.77	0.62	0.39	0.43
	2.01	1.88	3.13529	3.37		0.82	0.54	0.32	0.43
	1.93	2.23	2.87556	3.12		0.76	0.7	0.24	0.43
	2.01	2.14	3.57164	3.32		0.77	0.7	0.32	0.43
	2.3	2.1	3.33921	3.34		0.72	0.62	0.32	0.36
	2.23	2.05	2.9967	3.78		0.72	0.82	0.32	0.29
	1.93	2.05	3.35092	3.23		0.87	0.7	0.39	0.23
	2	2.14	3.3269	3.8		0.82	0.78	0.47	0.49
	1.95	1.98	2.87556	3.36		0.7	0.62	0.32	0.36
	1.95	2.06	2.89894	3.49		0.7	0.7	0.48	0.5
	1.96	2.26	3.27299	3.54		0.67	0.62	0.39	0.33
	2.1	2.03	2.97375	3.78		0.77	0.7	0.32	0.42
	2.02	1.91	3.39309	3.29		0.77	0.78	0.32	0.42
	2.25	1.94	2.96128	3.31		0.7	0.7	0.47	0.33
	1.96	2.06	3.61	3.17		0.7	0.54	0.32	0.33
	1.9	2.14	3.1	3.16		0.78	0.62	0.32	0.42
	2	1.98	3.56	3.29		0.54	0.62	0.55	0.25
	2.04	2.11	3.12	3.33		0.54	0.7	0.55	0.53
	2.1	2.09	3.36	3.24		0.87	0.88	0.32	0.42
	1.98	1.92	3.44	3.17		0.62	0.78	0.39	0.33
	1.9	2.11	3.39	3.31		0.47	0.7	0.47	0.42
	1.99	2.02	3.37	3.35		0.54	0.54	0.39	0.39
	2.27	2.03	3.39	3.16		0.62	0.78	0.39	0.42
	1.93	2.01	3.33	3.35		0.78	0.54	0.47	0.42
	2.02	1.98	3.36	3.34		0.7	0.67	0.39	0.46
Mean	2.01296	2.03673	3.30639	3.33888		0.684286	0.698673	0.386735	0.405918
S.D.	0.117727	0.111401	0.269664	0.18447		0.100166	0.0928655	0.100626	0.083002
p	0.081255		0.143769			0.233286		0.100239
